# Supplementary material for: Mosquito Vector Competence for Japanese Encephalitis Virus
Source: MDPI journal article supplement (doi:10.3390/v13061154), 2021-06-16
Supplement: s1 [file s1]

**Table S1.** Mosquito vector competence studies for JEV.

| Mosquito Species          | Ref.  | Mosquito Origin *                                     | Virus Strain *                                                      | Virus Concentration                                                                               | Mosquito Infection Procedure                                                                                                                | Mosquito Infection Rate                                                                                                                                    | Mosquito Dissemination Rate                          | Mosquito Transmission Rate #                |
|---------------------------|-------|-------------------------------------------------------|---------------------------------------------------------------------|---------------------------------------------------------------------------------------------------|---------------------------------------------------------------------------------------------------------------------------------------------|------------------------------------------------------------------------------------------------------------------------------------------------------------|------------------------------------------------------|---------------------------------------------|
| <i>Aedes aegypti</i>      | [181] | Taiwan (laboratory colony, Tainan)                    | n/d (isolated from <i>Cx. annulus</i> , Taiwan 1972)                | 10 <sup>4.2</sup> MID50 per mosquito                                                              | Parenteral infection (injection)                                                                                                            | JEV detected at 7 dpi                                                                                                                                      | n/d                                                  | n/d                                         |
|                           | [162] | n/d (laboratory colony, CDC)                          | SA14 (genotype III; isolated from <i>Cx. pipiens</i> , China, 1954) | 6.0 log <sub>10</sub> pfu/mL (5.5 log <sub>10</sub> pfu per mosquito) for intrathoracic injection | Intrathoracic injection and feeding blood meal with washed calf red blood cells with cotton pledgets for 15–30 min                          | <i>Intrathoracic injection</i> : at 9 dpi 6.3 log <sub>10</sub> per mosquito;<br><i>Orally infected</i> : at 15 dpi 5.4 log <sub>10</sub> pfu per mosquito | n/d                                                  | n/d                                         |
|                           | [38]  | Australia (laboratory colony, Townsville, Queensland) | TS3306 (genotype II; <i>Och. vigilax</i> , Australia, 1998)         | mean 10 <sup>4.5</sup> TCID50/mL                                                                  | feeding for 2–4 h at 37 °C on virus diluted in heparinized rabbit blood and 1% sucrose by glass membrane feeder (pig intestine as membrane) | 27% (16/60) at 14–15 dpi                                                                                                                                   | 17% (10/60) [legs], 25% (15/60) [heads] at 14–15 dpi | n/d                                         |
|                           | [168] | n/d (laboratory colony)                               | N28 (genotype III; pig isolate China, 2015)                         | 10 <sup>3</sup> MID50                                                                             | Intrathoracic injection or blood meal feeding of mice blood with Hemotek system                                                             | JEV detectable at 10 dpi in whole body and midgut                                                                                                          | n/d                                                  | JEV detectable at 10 dpi in salivary glands |
| <i>Aedes albolineatus</i> | [181] | Taiwan (laboratory colony, Nantou)                    | n/d (isolated from <i>Cx. annulus</i> , Taiwan 1972)                | 10 <sup>4.2</sup> MID50 per mosquito                                                              | Parenteral infection (injection)                                                                                                            | JEV detected at 7 dpi                                                                                                                                      | n/d                                                  | n/d                                         |
| <i>Aedes albopictus</i>   | [161] | Taiwan (laboratory colony, Taipei, 1960)              | T-143 ( <i>Cx. tritaeniorhynchus</i> , Taipei, Taiwan, 1960)        | viremia in pig: 10 <sup>1</sup> –10 <sup>2.5</sup> LD50                                           | feeding on viremic pig                                                                                                                      | 0% (0/114)                                                                                                                                                 | n/d                                                  | n/d                                         |
|                           | [181] | Taiwan (laboratory colony, Taipei)                    | n/d (isolated from <i>Cx. annulus</i> , Taiwan 1972)                | 10 <sup>4.2</sup> MID50 per mosquito                                                              | Parenteral infection (injection)                                                                                                            | JEV detected at 7 dpi                                                                                                                                      | n/d                                                  | n/d                                         |

|                              |       |                                                                                           |                                                                                                                                                                                                                                    |                                                                                                   |                                                                                                                        |                                                                                                                                                                                 |                                                                      |                                                                                      |
|------------------------------|-------|-------------------------------------------------------------------------------------------|------------------------------------------------------------------------------------------------------------------------------------------------------------------------------------------------------------------------------------|---------------------------------------------------------------------------------------------------|------------------------------------------------------------------------------------------------------------------------|---------------------------------------------------------------------------------------------------------------------------------------------------------------------------------|----------------------------------------------------------------------|--------------------------------------------------------------------------------------|
|                              | [31]  | Taiwan<br>(laboratory colonies from <u>Sanhsia</u> , <u>Yunggho</u> , and <u>Liyang</u> ) | MQ1–2<br>( <i>Ae. albopictus</i> , Taipei, Taiwan, 1985)                                                                                                                                                                           | 10-fold serial dilutions of 7.5 log <sub>10</sub> WMICLD50/ 0.03 mL                               | intrathoracic injection, or ingestion (hanging drop feeding of defibrinated rabbit blood and 5% sucrose)               | Virus conc. in mosquitoes from <u>Sanhsia</u> : 2.03 log <sub>10</sub> MID50;<br><u>Yunggho</u> : 4.32 log <sub>10</sub> MID50;<br><u>Liyang</u> : 4.98 log <sub>10</sub> MID50 | n/d                                                                  | 27–39% with <u>Sanhsia</u> mosquitoes only (transmission to weanling mice)           |
|                              | [162] | n/d<br>(laboratory colony, CDC)                                                           | SA14<br>(genotype III; Isolated from <i>Cx. pipiens</i> , China, 1954)                                                                                                                                                             | 6.0 log <sub>10</sub> pfu/mL (5.5 log <sub>10</sub> pfu per mosquito) for intrathoracic injection | Intrathoracic injection and feeding blood meal with washed calf red blood cells with cotton pledgets for 15–30 min     | <i>Intrathoracic injection</i> : at 18 dpi 6.3 log <sub>10</sub> per mosquito;                                                                                                  | n/d                                                                  | n/d                                                                                  |
|                              | [32]  | Taiwan<br>(Liu-Chiu)                                                                      | CH1392<br>(genotype III; <i>Cx. tritaeniorhynchus</i> , Taiwan, 1990)                                                                                                                                                              | 1.25 × 10 <sup>7</sup> PFU/mL                                                                     | fed on drop of rabbit blood (3 mL rabbit blood, 0.3 g sucrose, 1 mL virus suspension) for 1 h                          | n/d                                                                                                                                                                             | n/d                                                                  | 47% at 14 dpi [virus detection in salivary glands]                                   |
|                              | [33]  | Australia<br>(field caught, F7, Masig Island, 2005)                                       | TS00<br>(genotype I: pig, Australia, 2000)                                                                                                                                                                                         | 3.5 log <sub>10</sub> TCID50/mL per mosquito                                                      | Feeding virus diluted in defibrinated sheep blood and 1% sucrose over cotton pledget for 2–4 h                         | 20% (4/25) at 14 dpi                                                                                                                                                            | 16% (4/25) at 14 dpi                                                 | 16% (4/25) at 14 dpi                                                                 |
|                              | [34]  | France<br>(Nice, 2011)                                                                    | recombinant virus from strain RP-9 (genotype III; wild type strain NT109 isolated from <i>Cx. tritaeniorhynchus</i> , Taiwan, 1985); And from strain XZ0934 (genotype V; isolated from <i>Cx. tritaeniorhynchus</i> , China, 2009) | 8 × 10 <sup>6</sup> FFU/mL                                                                        | blood meal of washed rabbit erythrocytes with 5μM ATP, fed for 2 h via blood-soaked cotton pledges in the dark at 28°C | 57–90% at 7 dpi<br>90–100% at 11–13 dpi                                                                                                                                         | 60–90% at 7 dpi<br>90–100% at 11–13 dpi (measured as infected heads) | 20–63% at 11–13 dpi (mean conc. in saliva RP-9: 45 FFU/saliva; XZ093: 38 FFU/saliva) |
| <b><i>Aedes alcasidi</i></b> | [181] | Taiwan<br>(laboratory colony, Taitung)                                                    | n/d<br>(isolated from <i>Cx. annulus</i> , Taiwan 1972)                                                                                                                                                                            | 10 <sup>4.2</sup> MID50 per mosquito                                                              | Parenteral infection (injection)                                                                                       | JEV detected at 7 dpi                                                                                                                                                           | n/d                                                                  | n/d                                                                                  |
| <b><i>Aedes desmotes</i></b> | [181] | Taiwan<br>(laboratory colony, Chia)                                                       | n/d<br>(isolated from <i>Cx. annulus</i> , Taiwan 1972)                                                                                                                                                                            | 10 <sup>4.2</sup> MID50 per mosquito                                                              | Parenteral infection (injection)                                                                                       | JEV detected at 7 dpi                                                                                                                                                           | n/d                                                                  | n/d                                                                                  |

|                        |       |                                                          |                                                          |                                                                                            |                                                                                                                           |                                                                                                                                                                    |                                                                                                                                                                    |                                                                                                                                                                |
|------------------------|-------|----------------------------------------------------------|----------------------------------------------------------|--------------------------------------------------------------------------------------------|---------------------------------------------------------------------------------------------------------------------------|--------------------------------------------------------------------------------------------------------------------------------------------------------------------|--------------------------------------------------------------------------------------------------------------------------------------------------------------------|----------------------------------------------------------------------------------------------------------------------------------------------------------------|
| <i>Aedes detritus</i>  | [111] | United Kingdom (England)                                 | Muar (genotype V; human, Malaysia, 1952)                 | 6 × log <sub>10</sub> pfu/mL                                                               | Feeding defibrinated horse blood supplemented with 0.02 μM ATP via Hemotek membrane feeding system (Parafilm as membrane) | 23 °C:<br>32% (8/25) at 7 dpi,<br>78% (25/32) at 14 dpi,<br>100% (6/6) at 21 dpi<br>28 °C:<br>60% (9/15) at 7 dpi,<br>50% (3/6) at 14 dpi,<br>100% (3/3) at 21 dpi | 23 °C:<br>20% (5/25) at 7 dpi,<br>72% (23/32) at 14 dpi,<br>100% (6/6) at 21 dpi<br>28 °C:<br>60% (9/15) at 7 dpi,<br>33% (2/6) at 14 dpi,<br>100% (3/3) at 21 dpi | 23 °C:<br>12% (3/25) at 7 dpi,<br>3% (1/32) at 14 dpi,<br>67% (4/6) at 21 dpi<br>28 °C:<br>27% (4/15) at 7 dpi,<br>17% (1/6) at 14 dpi,<br>33% (1/3) at 21 dpi |
| <i>Aedes dorsalis</i>  | [36]  | USA                                                      | Nakayama (genotype III; human, Japan, 1935)              | n/d                                                                                        | feeding on mouse brain virus suspension and defibrinated rabbit blood presented over cotton moistened with mixture of 10% | no infection detected (no virus recovery from blood-fed mosquitoes)                                                                                                | n/d                                                                                                                                                                | 17% (1/6) at 16 dpi [transmission to 21–28 day old Swiss mice (Webster strain)]                                                                                |
| <i>Aedes japonicus</i> | [23]  | Japan (Sapporo)                                          | JANAr-5681 ( <i>Cx. tritaeniorhynchus</i> , Japan, 1981) | 10 <sup>6.2</sup> pfu/mL (blood-soaked cotton)<br>10 <sup>3.7</sup> pfu/mL (viremic chick) | virus-blood mixture fed over soaked cotton or viremic chick                                                               | feeding on blood-soaked cotton:<br>90% at 14 dpi<br>viremic chick:<br>45% at 14 dpi                                                                                | n/d                                                                                                                                                                | blood-soaked cotton:<br>75% at 14 dpi<br>viremic chick:<br>33% at 14 dpi<br>[transmission to mice]                                                             |
|                        | [175] | Germany (Stuttgart) [ <i>Aedes japonicus japonicus</i> ] | n/d                                                      | n/d                                                                                        | 60% human blood, 30% fructose solution, 10% fetal calf serum, fed for 3 h on a soaked cotton stick                        | 100% at 14 dpi                                                                                                                                                     | n/d                                                                                                                                                                | n/d                                                                                                                                                            |

|                           |       |                                                                                              |                                                                                                                                                                                            |                                                                                                                              |                                                                                                                                             |                                                                                                                                                                  |                                                                                                                                                                  |                                                                                                                             |
|---------------------------|-------|----------------------------------------------------------------------------------------------|--------------------------------------------------------------------------------------------------------------------------------------------------------------------------------------------|------------------------------------------------------------------------------------------------------------------------------|---------------------------------------------------------------------------------------------------------------------------------------------|------------------------------------------------------------------------------------------------------------------------------------------------------------------|------------------------------------------------------------------------------------------------------------------------------------------------------------------|-----------------------------------------------------------------------------------------------------------------------------|
|                           | [157] | Japan<br>(laboratory colony, Chiba prefecture, 2004)<br>[ <i>Aedes japonicus japonicus</i> ] | 17CxIT-I4-D31 (genotype I, <i>Cx. tritaeniorhynchus</i> , Japan, 2017);<br>JaGAR01 (genotype III, <i>Cx. tritaeniorhynchus</i> , Japan, 1959);<br>Muar (genotype V, human, Malaysia, 1952) | 17CxIT-I4-D31: 8.9 log <sub>10</sub> ffu/mL;<br>JaGAR01: 8.6 log <sub>10</sub> ffu/mL;<br>Muar: 7.1 log <sub>10</sub> ffu/mL | Feeding defibrinated rabbit blood 1:1 mixed with virus, supplemented with 3 mM ATP with Hemotek feeder (pig intestine as membrane)          | 17CxIT-I4-D31: 12% (3/25) at 7 dpi, 0% (0/23) at 14 dpi;<br>JaGAR01: 22% (7/32) at 7 dpi, 16% (5/32) at 14 dpi;<br>Muar: 0% (0/360 at 7 dpi, 3% (1/29) at 14 dpi | 17CxIT-I4-D31: 12% (3/25) at 7 dpi, 0% (0/23) at 14 dpi;<br>JaGAR01: 22% (7/32) at 7 dpi, 16% (5/32) at 14 dpi;<br>Muar: 0% (0/360 at 7 dpi, 3% (1/29) at 14 dpi | 17CxIT-I4-D31: 67% (2/3) at 7 dpi;<br>JaGAR01: 71% (5/7) at 7 dpi, 100% (5/5) at 14 dpi;<br>Muar: 100% (1/1) at 14 dpi      |
| <i>Aedes kochi</i>        | [38]  | Australia (Queensland, <u>Bamaga</u> and <u>Cairns</u> )                                     | TS3306 (genotype II; isolated from <i>Och. vigilax</i> , Australia, 1998)                                                                                                                  | mean 10 <sup>4.5</sup> TCID <sub>50</sub> /mL                                                                                | feeding for 2–4 h at 37°C on virus diluted in heparinized rabbit blood and 1% sucrose by glass membrane feeder (pig intestine as membrane)  | <u>Bamaga</u> : 21% (6/28) at 14–15 dpi<br><u>Cairns</u> : 11% (1/9) at 14–15 dpi                                                                                | n/d                                                                                                                                                              | <u>Bamaga</u> : 0% (0/8) at 14–15 dpi<br><u>Cairns</u> : 13% (1/8) at 14–15 dpi [transmission to Quackenbush suckling mice] |
| <i>Aedes malikuli</i>     | [181] | Taiwan (laboratory colony, Chiaai)                                                           | n/d (isolated from <i>Cx. annulus</i> , Taiwan 1972)                                                                                                                                       | 10 <sup>4.2</sup> MID <sub>50</sub> per mosquito                                                                             | Parenteral infection (injection)                                                                                                            | JEV detected at 7 dpi                                                                                                                                            | n/d                                                                                                                                                              | n/d                                                                                                                         |
| <i>Aedes nigromaculis</i> | [36]  | USA                                                                                          | Nakayama (genotype III; human, Japan, 1935)                                                                                                                                                | n/d                                                                                                                          | feeding mixture of 10% mouse brain virus suspension and defibrinated rabbit blood over cotton                                               | infection proven due to virus recovery from blood-fed mosquitoes at 16 dpi                                                                                       | n/d                                                                                                                                                              | 80% (4/5) at 8–14 dpi [transmission to 21–28 day old Swiss mice (Webster strain)]                                           |
| <i>Aedes notoscriptus</i> | [38]  | Australia (laboratory colony, Closeburn, Queensland; and field-caught, Cairns, Queensland)   | TS3306 (genotype II; isolated from <i>Och. vigilax</i> , Australia, 1998)                                                                                                                  | mean 10 <sup>4.5</sup> TCID <sub>50</sub> /mL                                                                                | feeding for 2–4 h at 37 °C on virus diluted in heparinized rabbit blood and 1% sucrose by glass membrane feeder (pig intestine as membrane) | <u>colony</u> : 27% (13/48) at 13–14 dpi<br><u>field-caught</u> : 20% (1/5) at 14–15 dpi                                                                         | <u>colony</u> : 8% (4/48) at 13–14 dpi<br><u>field-caught</u> : 20% (1/5) at 14–15 dpi                                                                           | <u>colony</u> : 27% (3/11) at 13–14 dpi<br>[transmission to Quackenbush suckling mice]                                      |
|                           | [166] | New Zealand (field-caught, Auckland, 2009)                                                   | Nakayama (genotype III; human, Japan, 1935)                                                                                                                                                | 8.3 log <sub>10</sub> pfu/mL                                                                                                 | Feeding of virus mixed with goose, rabbit, or bovine blood, 2.5% sucrose, 0.02 μM ATP over soaked pledget                                   | 0% (0/39) at 14 dpi                                                                                                                                              | n/d                                                                                                                                                              | n/d                                                                                                                         |

|                              |         |                                                                                                 |                                                                           |                                                                                      |                                                                                                                                             |                                                                                                                  |                                                                                                  |                                                                                     |
|------------------------------|---------|-------------------------------------------------------------------------------------------------|---------------------------------------------------------------------------|--------------------------------------------------------------------------------------|---------------------------------------------------------------------------------------------------------------------------------------------|------------------------------------------------------------------------------------------------------------------|--------------------------------------------------------------------------------------------------|-------------------------------------------------------------------------------------|
| <i>Aedes purpureus</i>       | [38]    | Australia (field-caught, Bamaga, Queensland)                                                    | TS3306 (genotype II; isolated from <i>Och. vigilax</i> , Australia, 1998) | mean 10 <sup>4.5</sup> TCID50/mL                                                     | feeding for 2–4 h at 37 °C on virus diluted in heparinized rabbit blood and 1% sucrose by glass membrane feeder (pig intestine as membrane) | 100% (2/2) at 14–15 dpi                                                                                          | 100% (2/2) at 14–15 dpi [virus detected in head + salivary glands] but no virus detected in legs | n/d                                                                                 |
| <i>Aedes togoi</i>           | [181]   | Taiwan (laboratory colony, Taipei)                                                              | n/d (isolated from <i>Cx. annulus</i> , Taiwan 1972)                      | 10 <sup>4.2</sup> MID50 per mosquito                                                 | Parenteral infection (injection)                                                                                                            | JEV detected at 7 dpi                                                                                            | n/d                                                                                              | n/d                                                                                 |
| <i>Aedes varipalpus</i>      | [36]    | USA                                                                                             | Nakayama (genotype III; human, Japan, 1935)                               | n/d                                                                                  | feeding on mixture of 10% mouse brain virus suspension and defibrinated rabbit blood via cotton                                             | infection proven due to virus recovery from blood-fed mosquitoes at 14 dpi                                       | n/d                                                                                              | no transmission to 21–28 day old Swiss mice (Webster strain)                        |
| <i>Aedes vexans</i>          | [35,35] | Guam                                                                                            | Okinawa strain (human, Japan, 1945)                                       | n/d                                                                                  | n/d                                                                                                                                         | n/d                                                                                                              | n/d                                                                                              | successful transmission to infant mice                                              |
|                              | [36]    | USA                                                                                             | Nakayama (genotype III; human, Japan, 1935)                               | n/d                                                                                  | feeding on soaked cotton moistened with mixture of 10% mouse brain virus suspension and defibrinated rabbit blood                           | no infection detected [no virus recovery from blood-fed mosquitoes]                                              | n/d                                                                                              | no transmission to 21–28 day old Swiss mice (Webster strain)                        |
| <i>Aedes vexans nipponii</i> | [23]    | Japan (Sapporo)                                                                                 | JANAr-5681 ( <i>Cx. tritaeniorhynchus</i> , Japan, 1981)                  | 10 <sup>4.7</sup> PFU/mL                                                             | viremic chick (inoculated with virus at the age of 1 d and maintained for 48–72 h)                                                          | 25% at 14 dpi                                                                                                    | n/d                                                                                              | n/d                                                                                 |
| <i>Aedes vigilax</i>         | [38]    | Australia (laboratory colony, Redlands Shire, Queensland; and field-caught, Cairns, Queensland) | TS3306 (genotype II; <i>Och. vigilax</i> , Australia, 1998)               | mean 10 <sup>4.5</sup> TCID50/mL                                                     | feeding for 2–4 h at 37 °C on virus diluted in heparinized rabbit blood and 1% sucrose by glass membrane feeder (pig intestine as membrane) | <u>colony</u> : 19% (12/62) at 9 dpi 39% (5/13) at 13 dpi<br><u>field-caught</u> : 57% (43/75) at 14–15 dpi      | <u>colony</u> : 18% (11/62) at 9 dpi 39% (5/13) at 13 dpi                                        | <u>colony</u> : 0% (0/4) at 13 dpi<br><u>field-caught</u> : 17% (3/18) at 14–15 dpi |
|                              | [182]   | Australia (laboratory colony)                                                                   | Nakayama (genotype III; human, Japan, 1935)                               | 6.7 log <sub>10</sub> pfu/mL (intrathoracic injection: 0.15 µL; blood meal: ≈1.7 µL) | Intrathoracic injection or blood meal feeding with sheep erythrocytes through commercial sausage skin membrane at 37°C                      | <i>intrathoracic</i> injection: 88% (53/60) (6.2 log <sub>10</sub> pfu/mosquito); <i>blood meal</i> : 12% (7/60) | <u>n/d</u>                                                                                       | <u>n/d</u>                                                                          |
| <i>Anopheles hyrcanus</i>    | [176]   | India (laboratory colony, Pune)                                                                 | n/d                                                                       | n/d                                                                                  | n/d                                                                                                                                         | virus detected up to 11 dpi                                                                                      | n/d                                                                                              | no transmission to chicks                                                           |

|                              |         |                                              |                                                                                                                                  |                                                     |                                                                                                    |                                                                             |     |                                                                                                                                      |
|------------------------------|---------|----------------------------------------------|----------------------------------------------------------------------------------------------------------------------------------|-----------------------------------------------------|----------------------------------------------------------------------------------------------------|-----------------------------------------------------------------------------|-----|--------------------------------------------------------------------------------------------------------------------------------------|
| <b>Anopheles freeborni</b>   | [36]    | USA<br>[ <i>An. maculipennis freeborni</i> ] | Nakayama (genotype III; human, Japan, 1935)                                                                                      | n/d                                                 | feeding mixture of 10% mouse brain virus suspension and defibrinated rabbit blood on soaked cotton | infection proven due to virus recovery from blood-fed mosquitoes at 0–8 dpi | n/d | no transmission to 21–28 day old Swiss mice (Webster strain)                                                                         |
| <b>Anopheles sinensis</b>    | [181]   | Taiwan (Taipei)                              | n/d<br>(isolated from <i>Cx. annulus</i> , Taiwan 1972)                                                                          | 10 <sup>4.2</sup> MID50 per mosquito                | Parenteral infection (injection)                                                                   | JEV detected at 7 dpi                                                       | n/d | n/d                                                                                                                                  |
| <b>Anopheles stephensi</b>   | [181]   | n/d                                          | n/d<br>(isolated from <i>Cx. annulus</i> , Taiwan 1972)                                                                          | 10 <sup>4.2</sup> MID50 per mosquito                | Parenteral infection (injection)                                                                   | JEV detected at 7 dpi                                                       | n/d | n/d                                                                                                                                  |
| <b>Anopheles tessellatus</b> | [110]   | India (laboratory colony, 1968)              | 733913 (genotype I; human, India)                                                                                                | 4.0 dex (viremia in chicks)                         | feeding on chicks (infected with 5.0 dex) over night                                               | virus detected up to 11 days after infection                                | n/d | 31% (4/13) at 6–11 dpi [transmission to chicks]                                                                                      |
| <b>Armigeres subalbatus</b>  | [181]   | Taiwan (laboratory colony, Taitung)          | n/d<br>(isolated from <i>Cx. annulus</i> , Taiwan 1972)                                                                          | 10 <sup>4.2</sup> MID50 per mosquito                | Parenteral infection (injection)                                                                   | JEV detected at 7 dpi                                                       | n/d | n/d                                                                                                                                  |
|                              | [32]    | Taiwan (Liu-Chiu, 1997)                      | CH1392 (genotype III; <i>Cx. tritaeniorhynchus</i> , Taiwan, 1990)<br>T1P1 (genotype III; <i>Arm. subalbatus</i> , Taiwan, 1997) | 1.25 10 <sup>7</sup> pfu/mL                         | feeding for 1 h on drop of rabbit blood (3 mL rabbit blood, 0.3 g sucrose, 1 mL virus suspension)  | n/d                                                                         | n/d | CH1392: 88% at 14 dpi for JEV<br>T1P1: 40% at 15 dpi and 79% at 20 dpi for [virus detection in salivary glands]                      |
|                              | [42]    | Taiwan (laboratory colony, Liu-Chiu, 1997)   | T1P1 (genotype III, <i>Ar. subalbatus</i> , Taiwan, 1997)                                                                        | 4.5 × 10 <sup>8</sup> pfu/mL (0.17 µL per mosquito) | Intrathoracic injection of <i>Wolbachia</i> -infected and <i>Wolbachia</i> -free mosquitoes        | n/d                                                                         | n/d | <i>Wolbachia</i> -infected: 77% (23/30);<br><i>Wolbachia</i> -infected: 73% (22/30) at 7 dpi<br>[measured by IFA in salivary glands] |
|                              |         |                                              |                                                                                                                                  |                                                     |                                                                                                    |                                                                             |     |                                                                                                                                      |
| <b>Culex annulirostris</b>   | [35,35] | Guam [ <i>Cx. jepsoni</i> ]                  | Okinawa strain (human, Japan, 1945)                                                                                              | n/d                                                 | n/d                                                                                                | n/d                                                                         | n/d | successful transmission to infant mice                                                                                               |

|                                          |          |                                                                                                                                           |                                                                    |                                                                                                  |                                                                                                                                                            |                                                                                                                                                                                                                             |                                                                                                                               |                                                                                                                                                                                                                                          |
|------------------------------------------|----------|-------------------------------------------------------------------------------------------------------------------------------------------|--------------------------------------------------------------------|--------------------------------------------------------------------------------------------------|------------------------------------------------------------------------------------------------------------------------------------------------------------|-----------------------------------------------------------------------------------------------------------------------------------------------------------------------------------------------------------------------------|-------------------------------------------------------------------------------------------------------------------------------|------------------------------------------------------------------------------------------------------------------------------------------------------------------------------------------------------------------------------------------|
|                                          |          | Australia<br>(laboratory colony,<br>Brisbane,<br>Queensland; and<br>field-caught<br>from <u>Bamaga</u> and<br><u>Cairns</u> , Queensland) | TS3306<br>(genotype II; <i>Och.<br/>vigilax</i> , Australia, 1998) | mean 10 <sup>4.5</sup><br>TCID50/mL                                                              | feeding for 2–4 h at 37<br>°C on virus diluted in<br>heparinized rabbit blood<br>and 1% sucrose by glass<br>membrane feeder (pig<br>intestine as membrane) | laboratory colony:<br>78% (14/18) at 5 dpi<br>89% (16/18) at 7 dpi<br>94% (17/18) at 10 dpi<br>100% (36/36) at 14<br>dpi<br><u>Bamaga</u> :<br>100% (2/2) at 14–15<br>dpi<br><u>Cairns</u> :<br>93% (51/55) at 14–15<br>dpi | laboratory<br>colony:<br>6% (1/18) at 5 dpi<br>33% (6/18) at 7<br>dpi<br>78% (14/18) at 10<br>dpi<br>64% (23/36) at<br>14 dpi | laboratory colony:<br>24% (4/17) dpi<br>57% (8/14) at 10 dpi<br>81% (13/16) at 14 dpi<br><u>Bamaga</u> :<br>0% (0/2) at 14–15 dpi<br><u>Cairns</u> :<br>61% (14/23) at 14–15<br>dpi<br>[transmission to<br>Quackenbush suckling<br>mice] |
|                                          | [182]    | Australia<br>(laboratory<br>colony)                                                                                                       | Nakayama (genotype<br>III; human, Japan, 1935)                     | 6.7 log <sub>10</sub> pfu/mL<br>(intrathoracic<br>injection: 0.15 µL;<br>blood meal: ≈1.3<br>µL) | Intrathoracic injection<br>or blood meal feeding with<br>sheep erythrocytes through<br>commercial sausage skin<br>membrane at 37 °C                        | intrathoracic<br>injection: 6.0 log <sub>10</sub><br>pfu/mosquito<br>blood meal: 7%<br>(4/60) (5.0 log <sub>10</sub><br>pfu/mosquito)                                                                                       | n/d                                                                                                                           | n/d                                                                                                                                                                                                                                      |
|                                          | [44]     | Australia<br>(laboratory<br>colony, Brisbane,<br>1998)                                                                                    | TS3306<br>(genotype II; <i>Och.<br/>vigilax</i> , Australia, 1998) | n/d                                                                                              | feeding on hanging<br>drop of heparinized rabbit<br>blood and 1% sucrose                                                                                   | n/d                                                                                                                                                                                                                         | n/d                                                                                                                           | 60% (6/10) at 13 dpi<br>[transmission to flying fox<br><i>Pteropus alecto</i> ]                                                                                                                                                          |
| <b><i>Culex<br/>annulus</i></b>          | [181]    | Taiwan<br>(laboratory<br>colony, Hsinchu)                                                                                                 | n/d<br>(isolated from <i>Cx.<br/>annulus</i> , Taiwan 1972)        | 10 <sup>4.2</sup> MID50 per<br>mosquito                                                          | Parenteral infection<br>(injection)                                                                                                                        | JEV detected at 7 dpi                                                                                                                                                                                                       | n/d                                                                                                                           | n/d                                                                                                                                                                                                                                      |
|                                          | [49]     | India<br>(laboratory<br>colony from Virus<br>Research Centre)                                                                             | 733913<br>(genotype I; human,<br>India)                            | n/d<br>(ducklings infected<br>with 4.9–5.2 dex)                                                  | feeding in viremic<br>ducklings (viremia 1–4.5<br>dex)                                                                                                     | feeding on chicken<br>with viremia of 1dex: 9%<br>at 9–12 dpi;<br>viremia of 4.2 dex:<br>up to 100% at 9–12<br>dpi                                                                                                          | n/d                                                                                                                           | transmission to<br>duckling (1/1)                                                                                                                                                                                                        |
| <b><i>Culex<br/>bitaeniorhynchus</i></b> | [50]     | India<br>(Pune)                                                                                                                           | 733913<br>(genotype I; human,<br>India)                            | n/d<br>(chicks infected<br>with 2.4–4.5 dex)                                                     | feeding in viremic<br>chicks (viremia 3.1–4.7 dex)                                                                                                         | 47–53% at 10 dpi<br>62% at 12 dpi                                                                                                                                                                                           | n/d                                                                                                                           | 64–75% at 10 dpi<br>89% at 12 dpi<br>total: 18/24<br>[transmission to<br>chicks]                                                                                                                                                         |
|                                          | [51,164] | India<br>(laboratory<br>colony)                                                                                                           | 733913<br>(genotype I; human,<br>India)                            | n/d<br>(chicks infected<br>with 4.0 dex)                                                         | feeding on chicks<br>(infected with 4.0 dex)                                                                                                               | n/d                                                                                                                                                                                                                         | n/d                                                                                                                           | successful<br>transmission to chicks                                                                                                                                                                                                     |
| <b><i>Culex<br/>fuscocephala</i></b>     | [60]     | Thailand<br>(Chiengmai<br>valley)                                                                                                         | BKM-984–70<br>( <i>Cx. fuscocephala</i> ,<br>Thailand, 1970)       | average 8 pfu per<br>mosquito                                                                    | feeding on viremic<br>white Leghorn chicks<br>(infected with 1700 pfu 55 h<br>before mosquito feeding)                                                     | 95–100% at 10–27<br>dpi                                                                                                                                                                                                     | n/d                                                                                                                           | 10–20% at 10–27 dpi<br>[transmission to<br>chicks]                                                                                                                                                                                       |

|                      |       |                                              |                                                                    |                                                                                            |                                                                                                                                                                  |                                                                                                  |                     |                                                                                          |
|----------------------|-------|----------------------------------------------|--------------------------------------------------------------------|--------------------------------------------------------------------------------------------|------------------------------------------------------------------------------------------------------------------------------------------------------------------|--------------------------------------------------------------------------------------------------|---------------------|------------------------------------------------------------------------------------------|
| <i>Culex gelidus</i> | [61]  | Taiwan (JEVRU laboratory colony)             | TaiAn 171 (pig, Taiwan, 1971)                                      | $10^{-0.89}$ – $10^{-1.91}$ mouse LD50 in pig serum on day of mosquito feeding             | feeding on viremic pigs (infected with $10^{5.5}$ mouse LD50)                                                                                                    | n/d                                                                                              | n/d                 | 0% at 12 dpi<br>22% at 17 dpi<br>68% at 21 dpi<br>[transmission to white leghorn chicks] |
|                      | [19]  | Malaysia strain (subcolony of WRAIR)         | FM380 ( <i>Cx tritaeniorhynchus</i> , Japan, 1950)                 | $1.3 \times 10^5$ LD50/mL;<br>$3.3 \times 10^5$ LD50/mL                                    | feeding on viremic white Leghorn chicks (1–3 days old, infected with 100–10,000 mouse LD50 1–3 days before mosquito feeding)                                     | 43.7% (116/265) at 6–21 dpi                                                                      | n/d                 | 72–85% (total: 31/40) at 28 dpi<br>[transmission to White leghorn chicks]                |
|                      | [151] | Malaysia (laboratory colony)                 | FM380 ( <i>Cx tritaeniorhynchus</i> , Japan, 1950)                 | n/d [viremia in chicks around $10^4$ LD50 in suckling mice after intracranial inoculation] | 3–7 days after emergence feeding on viremic chicks (around $10^4$ LD50) for transmission to horses; feeding on infected horse for further transmission to chicks | n/d                                                                                              | n/d                 | 0% (0/42) transmission to chicks when mosquitoes fed on infected horse                   |
|                      | [38]  | Australia (field caught, Cairns, Queensland) | TS3306 (genotype II; <i>Och. vigilax</i> , Australia, 1998)        | mean $10^{4.5}$ TCID50/mL                                                                  | feeding for 2–4 h at 37 °C on virus diluted in heparinized rabbit blood and 1% sucrose by glass membrane feeder (pig intestine as membrane)                      | 100% (4/4) at 14–15 dpi                                                                          | n/d                 | 100% (1/1) at 14–15 dpi<br>[transmission to Quackenbush suckling mice]                   |
|                      | [182] | Australia (laboratory colony)                | Nakayama (genotype III; human, Japan, 1935)                        | $6.7 \log_{10}$ pfu/mL (intrathoracic injection: 0.15 µL; blood meal: $\approx 1.9$ µL)    | Intrathoracic injection or blood meal feeding with sheep erythrocytes over soaked cotton pledgets                                                                | intrathoracic injection: 92% (55/60);<br>blood meal: 18% (11/60) ( $5.5 \log_{10}$ pfu/mosquito) | <u>n/d</u>          | <u>n/d</u>                                                                               |
|                      | [82]  | India (laboratory colony, Pune)              | P20778 (genotype III, human, India, 1958)                          | n/d                                                                                        | intrathoracic injection                                                                                                                                          | JEV detectable from 4 dpi to 14 dpi                                                              | n/d                 | JEV detectable at 10 dpi and 14 dpi                                                      |
| <i>Culex pipiens</i> | [90]  | n/d                                          | Nakayama (genotype III; human, Japan, 1935)                        | n/d                                                                                        | feeding on mouse-brain-virus solution in rabbit blood over cotton pads                                                                                           | n/d                                                                                              | n/d                 | 50% (2/4) at 9 dpi                                                                       |
|                      | [183] | Japan (laboratory colony)                    | JaGAR 01 (genotype III; <i>Cx. tritaeniorhynchus</i> , Japan 1959) | n/d                                                                                        | intrathoracic injection                                                                                                                                          | n/d                                                                                              | n/d                 | JEV detection in salivary glands at 19 dpi                                               |
|                      | [166] | USA (laboratory colony, Pennsylvania, 2002)  | Nakayama (genotype III; human, Japan, 1935)                        | $8.1 \log_{10}$ pfu/mL                                                                     | Feeding of virus mixed with goose, rabbit, or bovine blood, 2.5% sucrose, 0.02 µM ATP over soaked pledget                                                        | 10% (5/50) at 14 dpi                                                                             | 40% (2/5) at 14 dpi | 0% (0/5) at 14 dpi                                                                       |



|                               |      |                                                                                    |                                                                                                                               |                                                                                                                          |                                                                                                                   |                                                                                                                                |                                                                                                                            |                                                                                                                           |
|-------------------------------|------|------------------------------------------------------------------------------------|-------------------------------------------------------------------------------------------------------------------------------|--------------------------------------------------------------------------------------------------------------------------|-------------------------------------------------------------------------------------------------------------------|--------------------------------------------------------------------------------------------------------------------------------|----------------------------------------------------------------------------------------------------------------------------|---------------------------------------------------------------------------------------------------------------------------|
| <i>Culex pipiens molestus</i> | [94] | China<br>(laboratory colony)                                                       | SH7<br>(genotype I; <i>Cx. tritaeniorhynchus</i> , China, 2016),<br>SH15<br>(genotype III; <i>An. sinensis</i> , China, 2016) | 8.3–8.65 log<br>TCID50/mL in blood meals (4.78–4.9 log<br>TCID50/mL in engorged mosquitoes)                              | Hemotek membrane feeder or cotton pledge with defibrinated mice blood                                             | for SH7:<br>43% (12/28) at 7 dpi,<br>38% (17/45) at 14 dpi;<br><br>for SH15:<br>58% (19/33) at 7 dpi,<br>44% (23/52) at 14 dpi | for SH7:<br>27% (3/11) at 7 dpi,<br>24% (4/17) at 14 dpi;<br><br>for SH15:<br>32% (6/19) at 7 dpi,<br>35% (8/23) at 14 dpi | for SH7:<br>17% (2/12) at 7 dpi,<br>29% (5/17) at 14 dpi;<br><br>for SH15:<br>0% (0/13) at 7 dpi,<br>36% (8/22) at 14 dpi |
|                               | [95] | UK<br>(field caught, F1, Cheshire)                                                 | CNS138–11<br>(genotype II, human, Malaysia, 1999)                                                                             | 1 × 10 <sup>6</sup> pfu/mL                                                                                               | Feeding of heparinised human blood (heated to 39°C) with Hemotek feeding system for up to 3 h                     | 18 °C:<br>100% (18/18) at 21 dpi                                                                                               | n/d                                                                                                                        | 18 °C:<br>72% (13/18) at 21 dpi                                                                                           |
|                               | [97] | China<br>(laboratory colony)                                                       | SH7<br>(genotype I; <i>Cx. tritaeniorhynchus</i> , China, 2016)                                                               | 100 pfu per mosquito                                                                                                     | Intrathoracic injection                                                                                           | 100% (5/5) at 10 dpi                                                                                                           | 100% (5/5) at 10 dpi [JEV detection in legs and heads]                                                                     | 100% (5/5) at 10 dpi [JEV detection in salivary glands];<br>30% (6/20) [transmission to ducklings]                        |
|                               | [36] | USA<br>(laboratory colonies from Oakland, California)<br>[ <i>Culex molestus</i> ] | Nakayama<br>(genotype III; human, Japan, 1935)                                                                                | n/d                                                                                                                      | feeding on soaked cotton moistened with mixture of 10% mouse brain virus suspension and defibrinated rabbit blood | infection proven due to virus recovery from blood-fed mosquitoes at 3 and 16 dpi                                               | n/d                                                                                                                        | 27% (3/11) at 7–20 dpi transmission to 21–28 day old Swiss mice (Webster strain)                                          |
| <i>Culex pipiens molestus</i> | [92] | Taiwan<br>(Taipei, 1996; F40–43 generation)                                        | Sanhsia MQ1–2<br>( <i>Ae. albopictus</i> , Taiwan, 1995)                                                                      | 10 <sup>4.5</sup> PFU/mL (ingested 10 <sup>5.54</sup> PFU/mL per mosquito);<br>10 <sup>3</sup> to 10 <sup>8</sup> PFU/mL | feeding on hanging blood (defibrinated rabbit blood with 10% of sucrose) for 3 h                                  | n/d                                                                                                                            | n/d                                                                                                                        | 80–100% (total: 10/11) [transmission to mice]                                                                             |
|                               | [93] | Uzbekistan<br>(Tashkent, 2004; F1 generation)                                      | ROK-2.0028<br>( <i>Cx. tritaeniorhynchus</i> , South Korea, 2000)                                                             | 10 <sup>4.5</sup> –10 <sup>5.4</sup> PFU/mL                                                                              | feeding on leghorn chicks (2–4 days old, inoculated with 10 <sup>4</sup> PFU 2–3 days before mosquito feeding)    | 56% at 16–17 dpi<br><br>47% at 19 dpi<br><br>51% at 25–27 dpi                                                                  | 26% at 16–17 dpi<br><br>25% at 19 dpi<br><br>26% at 25–27 dpi                                                              | 8% at 19 dpi<br><br>8% at 25–27 dpi<br><br>[transmission to leghorn chicks]                                               |

|                              |       |                                                          |                                                                                                                                           |                                                                                                                            |                                                                                                                         |                                                                                                                                                                                                                                                                                                                                                                                                                                      |                              |                                                                                                                                            |
|------------------------------|-------|----------------------------------------------------------|-------------------------------------------------------------------------------------------------------------------------------------------|----------------------------------------------------------------------------------------------------------------------------|-------------------------------------------------------------------------------------------------------------------------|--------------------------------------------------------------------------------------------------------------------------------------------------------------------------------------------------------------------------------------------------------------------------------------------------------------------------------------------------------------------------------------------------------------------------------------|------------------------------|--------------------------------------------------------------------------------------------------------------------------------------------|
| <i>Culex pipiens pallens</i> | [169] | Japan<br>(HRp laboratory colony)                         | JaGAR 01<br>(genotype III; <i>Cx. tritaeniorhynchus</i> , Japan 1959);<br><br>JaGAR 19461<br>( <i>Cx. tritaeniorhynchus</i> , Japan 1961) | viremic chicken<br>with $10^3$ LD50/0.02 mL;<br>or<br><br>artificial blood<br>meal with $10^{1.7}$ – $10^{7.4}$<br>LD50/mL | feeding on viremic<br>chicken or<br>artificial blood meal<br>with rabbit blood                                          | JaGAR 01 at 10–14 dpi<br>feeding<br>on viremic chicken:<br>0% (0/23);<br>artificial blood meal<br>with<br>$10^{1.7}$ – $10^{2.2}$ LD50/0.02<br>mL:<br>0% (0/14) ;<br>$10^{3.9}$ – $10^4$ LD50/0.02<br>mL:<br>8% (1/12)<br>JaGAR 19461 at 10–<br>14 dpi after artificial blood<br>meal with<br>$10^4$ LD50/0.02 mL:<br>15% (5/34);<br>$10^5$ LD50/0.02 mL:<br>68% (19/28)<br>$10^{6.7}$ – $10^{7.4}$ LD50/0.02<br>mL:<br>100% (18/18) | n/d                          | n/d                                                                                                                                        |
|                              | [91]  | Japan                                                    | JaGAR 01<br>(genotype III; <i>Cx. tritaeniorhynchus</i> , Japan 1959);<br>JaGAR 19461<br>( <i>Cx. tritaeniorhynchus</i> , Japan 1961)     | n/d                                                                                                                        | n/d                                                                                                                     | n/d                                                                                                                                                                                                                                                                                                                                                                                                                                  | n/d                          | Successful<br>transmission<br>from infected<br>mosquitoes to uninfected<br>lizards, and<br>from infected lizards to<br>mice (via mosquito) |
|                              | [181] | Japan<br>(laboratory colony)                             | n/d<br>(isolated from <i>Cx. annulus</i> , Taiwan 1972)                                                                                   | $10^{4.2}$ MID50 per<br>mosquito                                                                                           | Parenteral infection<br>(injection)                                                                                     | JEV detected at 7 dpi                                                                                                                                                                                                                                                                                                                                                                                                                | n/d                          | n/d                                                                                                                                        |
|                              | [23]  | Japan,<br>(Sapporo)                                      | JANAr-5681<br>( <i>Culex tritaeniorhynchus</i> , Japan, 1981)                                                                             | $10^{4.1}$ PFU/mL                                                                                                          | viremic chick<br>(inoculated with virus at the<br>age of 1 d and maintained<br>for 48–72 h)                             | 30% at 14 dpi                                                                                                                                                                                                                                                                                                                                                                                                                        | n/d                          | n/d                                                                                                                                        |
|                              | [156] | South Korea<br>(Camp Greaves,<br>2003;<br>F1 generation) | ROK-2.0028<br>( <i>Cx. tritaeniorhynchus</i> ,<br>South Korea, 2000)                                                                      | $10^{5.2}$ PFU/mL<br>( $10^{4.3}$ pfu/mL were<br>not sufficient to infect<br>successfully)                                 | feeding on leghorn<br>chicks (2–4 days old,<br>inoculated with $10^2$ – $3$ PFU<br>2–3 days before mosquito<br>feeding) | 6% (2/32) at $\geq 12$ dpi                                                                                                                                                                                                                                                                                                                                                                                                           | 0% (0/6) at $\geq 12$<br>dpi | 0% (0/13)<br>[transmission to<br>chicks]                                                                                                   |

|                                                                                       |       |                                                             |                                                                                                                                                                                                                                  |                                                                      |                                                                                                                          |                                                                                                                                             |                                                                          |                                                                                                                               |
|---------------------------------------------------------------------------------------|-------|-------------------------------------------------------------|----------------------------------------------------------------------------------------------------------------------------------------------------------------------------------------------------------------------------------|----------------------------------------------------------------------|--------------------------------------------------------------------------------------------------------------------------|---------------------------------------------------------------------------------------------------------------------------------------------|--------------------------------------------------------------------------|-------------------------------------------------------------------------------------------------------------------------------|
|                                                                                       | [168] | n/d<br>(laboratory colony)                                  | N28<br>(genotype III; pig isolate China, 2015)                                                                                                                                                                                   | 10 <sup>3</sup> MID50                                                | Intrathoracic injection or blood meal feeding of mice blood with Hemotek system                                          | JEV detectable at 10 dpi in whole body and midgut                                                                                           | n/d                                                                      | JEV detectable at 10 dpi in salivary glands                                                                                   |
|                                                                                       | [96]  | n/d<br>(laboratory colony)                                  | N28<br>(genotype III; pig isolate China, 2015)                                                                                                                                                                                   | 10 <sup>3</sup> MID50                                                | Intrathoracic injection or blood meal feeding of mice blood with Hemotek system                                          | JEV detectable at 10 dpi in whole body and midgut                                                                                           | n/d                                                                      | JEV detectable at 10 dpi in salivary glands                                                                                   |
|                                                                                       | [167] | n/d<br>(laboratory colony)                                  | N28<br>(genotype III; pig isolate China, 2015)                                                                                                                                                                                   | 10 <sup>3</sup> MID50                                                | Intrathoracic injection                                                                                                  | JEV detectable at 6 dpi                                                                                                                     | n/d                                                                      | n/d                                                                                                                           |
| <b><i>Culex pipiens pipiens</i></b>                                                   | [36]  | USA<br>(laboratory colonies from Yakima Valley, Washington) | Nakayama<br>(genotype III; human, Japan, 1935)                                                                                                                                                                                   | n/d                                                                  | feeding on soaked cotton moistened with mixture of 10% mouse brain virus suspension and defibrinated rabbit blood        | infection proven due to virus recovery from blood-fed mosquitoes at 21 dpi                                                                  | n/d                                                                      | 25% (1/4) at 20 dpi transmission to 21–28 day old Swiss mice (Webster strain);<br><br>transmission to chicken (1/1) at 20 dpi |
|                                                                                       | [34]  | France<br>(Montpellier, 2010)                               | recombinant virus from strain RP-9 (genotype III; wildtype strain NT109 isolated from <i>Cx. tritaeniorhynchus</i> , Taiwan, 1985; recombinant virus from strain XZ0934 (genotype V; <i>Cx. tritaeniorhynchus</i> , China, 2009) | 8 x 10 <sup>6</sup> FFU/mL                                           | blood meal of washed rabbit erythrocytes with 5 µM ATP, fed for 2 h via blood-soaked cotton pledges in the dark at 28 °C | 26–36% at 7 dpi<br>70–95% at 11–13 dpi                                                                                                      | ≈25–38% at 7 dpi<br>≈50–80% at 11–13 dpi<br>[measured as infected heads] | 12–41% at 11–13 dpi<br>(mean conc. for JEV RP-9: 55 FFU/saliva, for JEV XZ0934: 35 FFU/saliva)                                |
|                                                                                       | [98]  | UK (laboratory colony)                                      | SA14<br>(genotype III; Isolated from <i>Cx pipiens</i> , China, 1954)                                                                                                                                                            | 1.8 × 10 <sup>6</sup> pfu/mL                                         | Blood meal feeding of defibrinated horse blood, and 1 µM ATP overnight with Hemotek system                               | 20 °C:<br>70% (39/56);<br>25 °C:<br>90% (18/20)<br>at 14 dpi                                                                                | 20 °C:<br>13% (5/40);<br>25 °C:<br>70% (14/20)<br>at 14 dpi              | 20 °C:<br>0% (0/40);<br>25 °C:<br>70% (14/20)<br>at 14 dpi                                                                    |
| <b><i>Culex pseudovishnui</i></b><br><b><i>Culex pseudovishnui</i></b><br>(continued) | [169] | Japan<br>(laboratory colony, Okoyama prefecture, 1968)      | JaGAR 01 (genotype III; <i>Cx. tritaeniorhynchus</i> , Japan 1959)                                                                                                                                                               | viremic chicken with 10 <sup>2</sup> –10 <sup>3.7</sup> LD50/0.02 mL | feeding on viremic chicken                                                                                               | viremia in chicken<br>10 <sup>2</sup> LD50/0.02 mL:<br>0% (0/19) at 10–14 dpi<br><br>10 <sup>3</sup> LD50/0.02 mL:<br>11% (13/117) at 10–14 | n/d                                                                      | n/d                                                                                                                           |

|                               |           |                                                             |                                                                    |                                                                       |                                                                                                                                                  |                                                                                                                                                                                                                        |                                                                       |                                                                                                                                                                                                                  |
|-------------------------------|-----------|-------------------------------------------------------------|--------------------------------------------------------------------|-----------------------------------------------------------------------|--------------------------------------------------------------------------------------------------------------------------------------------------|------------------------------------------------------------------------------------------------------------------------------------------------------------------------------------------------------------------------|-----------------------------------------------------------------------|------------------------------------------------------------------------------------------------------------------------------------------------------------------------------------------------------------------|
| <i>Culex quinquefasciatus</i> | [104]     | India (laboratory colony)                                   | P20778 (genotype III; human, India)                                | n/d                                                                   | feeding on viremic chicks (infected with 2–3 dex virus)                                                                                          | n/d                                                                                                                                                                                                                    | 60% at 8 dpi [detection of JEV antigen in mosquito heads]             | 44.4% [JEV antigen detection in salivary glands]; 75% (3/4) at 8 dpi [transmission to chicks]                                                                                                                    |
|                               | [105]     | India (laboratory colony)                                   | P20778 (genotype III; human, India)                                | 4.2 log/0.2 uL MID50 for intrathoracic infection                      | intrathoracic injection, or oral infection via feeding of infectious blood meal                                                                  | higher infection rate in intrathoracic infected compared to orally infected mosquitoes                                                                                                                                 | 49% (49/100) at 2–10 dpi [detection of JEV antigen in mosquito heads] | 51% (57/100) at 1–10 dpi [JEV antigen detection in salivary glands]                                                                                                                                              |
|                               | [35,35]   | Guam                                                        | Okinawa strain (human isolate, Japan, 1945)                        | n/d                                                                   | n/d                                                                                                                                              | n/d                                                                                                                                                                                                                    | n/d                                                                   | successful transmission to infant mice                                                                                                                                                                           |
|                               | [36]      | USA                                                         | Nakayama (genotype III; human isolate, Japan, 1935)                | n/d                                                                   | feeding on soaked cotton moistened with mixture of 10% mouse brain virus suspension and defibrinated rabbit blood; or feeding on viremic chicken | infection proven due to virus recovery from blood-fed mosquitoes at 26 dpi                                                                                                                                             | n/d                                                                   | 25% (4/16) at 11–25 dpi transmission to 21–28 day old Swiss mice (Webster strain) with mosquitoes infected by artificial blood meal; NO transmission to mice with mosquitoes fed on viremic chicken unsuccessful |
|                               | [108]     | n/a (laboratory colony)                                     | Okinawa strain (human isolate, Japan, 1945)                        | n/d                                                                   | feeding on cotton soaked with virus emulsion with 10% cane sugar                                                                                 | n/d                                                                                                                                                                                                                    | n/d                                                                   | 100% (1/1) at 6 dpi 100% (1/) at 8 dpi [transmission to suckling mice]                                                                                                                                           |
|                               | [109,170] | n/a (laboratory colony)                                     | Okinawa strain (human isolate, Japan, 1945)                        | 7.3 LD50                                                              | feeding on cotton soaked with virus emulsion with 10% cane sugar                                                                                 | n/d                                                                                                                                                                                                                    | n/d                                                                   | 100% (3/3) at 6 dpi; 72% (13/18) 13–43 dpi [transmission to mice]                                                                                                                                                |
|                               | [110]     | India (laboratory colony, 1954) [ <i>Culex fatigans</i> ]   | 733913 (genotype I; human, India)                                  | 4.0 dex (viremia in chicks at time point of mosquito feeding)         | feeding on chicks (infected with 5.0 dex) over night                                                                                             | virus detected up 15 days after infection                                                                                                                                                                              | n/d                                                                   | 61% (11/18) at 5–15 dpi                                                                                                                                                                                          |
|                               | [169]     | Japan (laboratory colony) [ <i>Culex pipiens fatigans</i> ] | JaGAR 01 (genotype III; <i>Cx. tritaeniorhynchus</i> , Japan 1959) | 10 <sup>3.9</sup> –10 <sup>5</sup> LD50/0.02 mL artificial blood meal | artificial blood meal with rabbit blood                                                                                                          | 0% (0/17) 10–14 dpi after infection with 10 <sup>4</sup> LD50/0.02 mL; 4% (1/24) 10–14 dpi after infection with 10 <sup>4.3</sup> LD50/0.02 mL; 38% (8/21) 10–14 dpi after infection with 10 <sup>5</sup> LD50/0.02 mL | n/d                                                                   | n/d                                                                                                                                                                                                              |

|       |                                                                                                   |                                                                                                                                       |                                       |                                                                                                                                             |                                                                                                                                |                                                                                    |                                                                                                                                |
|-------|---------------------------------------------------------------------------------------------------|---------------------------------------------------------------------------------------------------------------------------------------|---------------------------------------|---------------------------------------------------------------------------------------------------------------------------------------------|--------------------------------------------------------------------------------------------------------------------------------|------------------------------------------------------------------------------------|--------------------------------------------------------------------------------------------------------------------------------|
| [91]  | Japan<br>[ <i>Culex pipiens fatigans</i> ]                                                        | JaGAr 01<br>(genotype III; <i>Cx. tritaeniorhynchus</i> , Japan 1959);<br>JaGAr 19461<br>( <i>Cx. tritaeniorhynchus</i> , Japan 1961) | n/d                                   | n/d                                                                                                                                         | n/d                                                                                                                            | n/d                                                                                | Successful transmission from infected mosquitoes to lizards, and from infected lizards to mice (via mosquito)                  |
| [51]  | India<br>(laboratory colony)<br>[ <i>Cx. pipiens quinquefasciatus</i> ]                           | 733913<br>(genotype I; human, India)                                                                                                  | n/d<br>(chicks infected with 4.0 dex) | feeding on chicks<br>(infected with 4.0 dex)                                                                                                | n/d                                                                                                                            | n/d                                                                                | successful transmission to chicks                                                                                              |
| [181] | Taiwan<br>(laboratory colony)                                                                     | n/d<br>(isolated from <i>Cx. annulus</i> , Taiwan 1972)                                                                               | 10 <sup>4.2</sup> MID50 per mosquito  | Parenteral infection<br>(injection)                                                                                                         | JEV detected at 7 dpi                                                                                                          | n/d                                                                                | n/d                                                                                                                            |
| [32]  | Taiwan<br>(Tao-Yuan)                                                                              | CH1392<br>(genotype III; <i>Cx. tritaeniorhynchus</i> , Taiwan, 1990)                                                                 | 1.25 × 10 <sup>7</sup> PFU/mL         | fed on drop of rabbit blood (3 mL rabbit blood, 0.3 g sucrose, 1 mL virus suspension) for 1 h                                               | n/d                                                                                                                            | n/d                                                                                | 40% at 14 dpi<br>[virus detection in salivary glands]                                                                          |
| [171] | India                                                                                             | n/d                                                                                                                                   | n/d                                   | Feeding infectious blood meal                                                                                                               | susceptibility increases when <i>Pseudomonas sp.</i> and <i>Acinetobacter sp.</i> were incorporated in the mosquito blood meal | n/d                                                                                | n/d                                                                                                                            |
| [38]  | Australia<br>(laboratory colony, Gold Coast, Queensland; and field caught, Mareeba, Queensland)   | TS3306<br>(genotype II; <i>Och. vigilax</i> , Australia, 1998)                                                                        | mean 10 <sup>4.5</sup> TCID50/mL      | feeding for 2–4 h at 37 °C on virus diluted in heparinized rabbit blood and 1% sucrose by glass membrane feeder (pig intestine as membrane) | <u>colony</u> :<br>98% at 17–19 dpi in<br><u>field caught</u> :<br>56% at 14–15 dpi                                            | <u>colony</u> :<br>28% at 17–19 dpi                                                | <u>colony</u> :<br>50% at 17–19 dpi<br><u>field caught</u> :<br>0% at 14–15 dpi<br>[transmission to Quackenbush suckling mice] |
| [166] | New Zealand<br>(field-caught, Wellington, 2009)<br>USA<br>(laboratory colony, Pennsylvania, 2008) | Nakayama<br>(genotype III; human, Japan, 1935)                                                                                        | 8.1 log10 pfu/mL                      | Feeding of virus mixed with goose, rabbit, or bovine blood, 2.5% sucrose, 0.02 μM ATP over soaked pledget                                   | <u>New Zealand</u> :<br>17% (6/36) at 14 dpi<br><u>USA</u> :<br>86% (43/50) at 14 dpi                                          | <u>New Zealand</u> :<br>0% (0/6) at 14 dpi<br><u>USA</u> :<br>0% (0/443) at 14 dpi | <u>New Zealand</u> :<br>n/d<br><u>USA</u> :<br>0% (0/443) at 14 dpi                                                            |

|       |                                                 |                                                                                                                                                                    |                                                                                                                                                          |                                                                                                                           |                                                                                                                                                                               |                                                                                                                                                                                          |                                                                                                                                                                         |
|-------|-------------------------------------------------|--------------------------------------------------------------------------------------------------------------------------------------------------------------------|----------------------------------------------------------------------------------------------------------------------------------------------------------|---------------------------------------------------------------------------------------------------------------------------|-------------------------------------------------------------------------------------------------------------------------------------------------------------------------------|------------------------------------------------------------------------------------------------------------------------------------------------------------------------------------------|-------------------------------------------------------------------------------------------------------------------------------------------------------------------------|
| [111] | Brazil<br>(Recife;<br>laboratory colony)        | Muar<br>(genotype V; human,<br>Malaysia,1952)                                                                                                                      | 6 × log10 pfu/mL                                                                                                                                         | Hemotek membrane<br>feeding system (Parafilm as<br>membrane), defibrinated<br>horse blood supplemented<br>with 0.02μM ATP | for 23 °C:<br>25% (6/24) at 7 dpi,<br>62% (20/32) at 14<br>dpi,<br>70% (7/10) at 21 dpi<br>for 28 °C:<br>44% (4/9) at 7 dpi,<br>66% (8/12) at 14 dpi,<br>70% (7/10) at 21 dpi | for 23 °C:<br>21% (5/24) at 7<br>dpi,<br>34% (11/32) at<br>14 dpi,<br>70% (7/10) at 21<br>dpi<br>for 28 °C:<br>0% (0/9) at 7 dpi,<br>58% (7/12) at 14<br>dpi,<br>70% (7/10) at 21<br>dpi | for 23 °C:<br>17% (4/24) at 7 dpi,<br>3% (1/32) at 14 dpi,<br>50% (5/10) at 21 dpi<br>for 28 °C:<br>0% (0/9) at 7 dpi,<br>17% (2/12) at 14 dpi,<br>70% (7/10) at 21 dpi |
| [112] | USA<br>(Valdosta,<br>Georgia)                   | Tiara<br>(genotype III; human,<br>Japan, 1948)                                                                                                                     | 10 <sup>4.8</sup> TCID50/mL<br>(in engorged<br>mosquitoes immediately<br>after infection/ feeding)                                                       | Feedings with Hemotek<br>feeders and blood-soak<br>cotton pledges for 1 h                                                 | 100% at 7 dpi<br>(mean conc.: 10 <sup>4.2</sup><br>TCID50/mL)<br><br>84.6% at 14 dpi<br>(mean conc.: 10 <sup>4.5</sup><br>TCID50/mL)                                          | 0% at 7 dpi<br><br>50% at 14 dpi                                                                                                                                                         | 9.1% at 14 dpi                                                                                                                                                          |
| [172] | n/d                                             | 057434<br>(genotype III; human,<br>India, 2005)                                                                                                                    | 100 pfu per<br>mosquito                                                                                                                                  | Intrathoracic injection<br>or feeding of infectious<br>blood meal                                                         | JEV detectable at 7<br>dpi and 10 dpi                                                                                                                                         | n/d                                                                                                                                                                                      | n/d                                                                                                                                                                     |
| [113] | USA<br>(Valdosta,<br>Georgia;<br>F6 generation) | KE-93–83 (genotype Ia;<br>mosquitoes, Thailand,<br>1983);<br>JE-91<br>(genotype Ib;<br>mosquitoes, Korea, 1991);<br>Taira<br>(genotype III; human,<br>1948, Japan) | 10 <sup>7.99</sup> –10 <sup>8.36</sup><br>TCID50/mL in blood<br>meal<br>(10 <sup>4.36</sup> –10 <sup>4.81</sup><br>TCID50/mL per<br>engorged mosquitoes) | Feedings with Hemotek<br>feeders and blood-soak<br>cotton pledges with<br>defibrinated sheep blood for<br>1 h             | 44–95% at 7 dpi<br>(total: 76/115)<br><br>35–67% at 14 dpi<br>(total: 88/165)                                                                                                 | 8–30% at 7 dpi<br>(total: 8/47)<br><br>17–32% at 14 dpi<br>(total: 15/54)                                                                                                                | 5–8% at 14 dpi<br>(total: 6/88)                                                                                                                                         |

|                      |      |                                                                    |                                                                                                                                                                                                                                                                                                                                                                                                                                                                      |                                                  |                                                                                                                                                                |                                                                                                                                                                                                                                                                                                                                                                                                                          |                                                                                                                                                                                                                                                                                                                                                                                                                                            |                                                                                                                                                                                                                                                                                                                                                                                      |
|----------------------|------|--------------------------------------------------------------------|----------------------------------------------------------------------------------------------------------------------------------------------------------------------------------------------------------------------------------------------------------------------------------------------------------------------------------------------------------------------------------------------------------------------------------------------------------------------|--------------------------------------------------|----------------------------------------------------------------------------------------------------------------------------------------------------------------|--------------------------------------------------------------------------------------------------------------------------------------------------------------------------------------------------------------------------------------------------------------------------------------------------------------------------------------------------------------------------------------------------------------------------|--------------------------------------------------------------------------------------------------------------------------------------------------------------------------------------------------------------------------------------------------------------------------------------------------------------------------------------------------------------------------------------------------------------------------------------------|--------------------------------------------------------------------------------------------------------------------------------------------------------------------------------------------------------------------------------------------------------------------------------------------------------------------------------------------------------------------------------------|
|                      |      |                                                                    | KE-093–83<br>(genotype Ia;<br>mosquitoes, Thailand,<br>1983);<br>MAR864 (genotype I;<br><i>Cx. tritaeniorhynchus</i> ,<br>Cambodia, 1967);<br>JE-91<br>(genotype Ib; <i>Cx.</i><br><i>tritaeniorhynchus</i> , Korea,<br>1991);<br>CH392<br>(genotype III; <i>Cx.</i><br><i>tritaeniorhynchus</i> , Taiwan,<br>1987);<br>JKT27–087<br>(genotype III;<br>mosquitoes, Indonesia,<br>1987);<br>Sagiyama (genotype III;<br><i>Cx. tritaeniorhynchus</i> , 1957,<br>Japan) | 5.1–5.9 log10<br>pfu/mL                          | Feeding of defibrinated<br>cattle blood mixed with<br>freshly harvested viruses at<br>a 1:1 via Hemotek<br>membrane feeding system<br>covered with pork casing | KE-093–83:<br>93% (56/60) at 7 dpi,<br>78% (47/60) at 14<br>dpi;<br><br>MAR864:<br>93% (56/60) at 7 dpi,<br>82% (49/60) at 14<br>dpi;<br><br>JE-91:<br>78% (47/60) at 7 dpi,<br>97% (58/60) at 14<br>dpi;<br><br>CH392:<br>40% (24/60) at 7 dpi,<br>22% (13/60) at 14<br>dpi;<br><br>JKT27–087:<br>58% (35/60) at 7 dpi,<br>70% (42/60) at 14<br>dpi;<br><br>Sagiyama:<br>53% (32/60) at 7 dpi,<br>85% (51/60) at 14 dpi | KE-093–83:<br>30% (18/60) at 7<br>dpi,<br>55% (33/60) at<br>14 dpi;<br><br>MAR864:<br>35% (21/60) at 7<br>dpi,<br>18% (11/60) at<br>14 dpi;<br><br>JE-91:<br>43% (26/60) at 7<br>dpi,<br>72% (43/60) at<br>14 dpi;<br><br>CH392:<br>25% (15/60) at 7<br>dpi,<br>17% (10/60) at<br>14 dpi;<br><br>JKT27–087:<br>8% (5/60) at 7<br>dpi,<br>12% (7/60) at 14<br>dpi;<br><br>Sagiyama:<br>32% (19/60) at 7<br>dpi,<br>22% (13/60) at<br>14 dpi | KE-093–83:<br>2% (1/60) at 7 dpi,<br>7% (4/60) at 14 dpi;<br><br>MAR864:<br>13% (8/60) at 7 dpi,<br>8% (5/60) at 14 dpi;<br><br>JE-91:<br>5% (3/60) at 7 dpi,<br>18% (11/60) at 14 dpi;<br><br>CH392:<br>0% (0/60) at 7 dpi,<br>5% (3/60) at 14 dpi;<br><br>JKT27–087:<br>0% (0/60) at 7 dpi,<br>3% (2/60) at 14 dpi;<br><br>Sagiyama:<br>0% (0/60) at 7 dpi,<br>7% (4/60) at 14 dpi |
| <i>Culex sitiens</i> | [38] | Australia<br>(laboratory colony,<br>Coomera Island,<br>Queensland) | TS3306<br>(genotype II; <i>Och.</i><br><i>vigilax</i> , Australia, 1998)                                                                                                                                                                                                                                                                                                                                                                                             | mean 10 <sup>4.5</sup><br>TCID <sub>50</sub> /mL | feeding for 2–4 h at 37<br>°C on virus diluted in<br>heparinized rabbit blood<br>and 1% sucrose by glass<br>membrane feeder (pig<br>intestine as membrane)     | 83% (15/18) at 5 dpi,<br>83% (15/18) at 7 dpi,<br>89% (16/18) at 10<br>dpi,<br>92% (33/36) at 14 dpi                                                                                                                                                                                                                                                                                                                     | 6% (1/18) at 5<br>dpi,<br>28% (5/18) at 7<br>dpi,<br>33% (6/18) at 10<br>dpi,<br>11% (4/36) at 14<br>dpi                                                                                                                                                                                                                                                                                                                                   | 13% (2/15) at 7 dpi,<br>7% (1/15) at 10 dpi,<br>67% (10/15) at 14 dpi<br>[transmission to<br>Quackenbush suckling<br>mice]                                                                                                                                                                                                                                                           |

|                                |       |                                                        |                                                                                     |                                               |                                                                                                       |                                                                                                                                                             |     |                                                                                                                                                                                                                                                     |
|--------------------------------|-------|--------------------------------------------------------|-------------------------------------------------------------------------------------|-----------------------------------------------|-------------------------------------------------------------------------------------------------------|-------------------------------------------------------------------------------------------------------------------------------------------------------------|-----|-----------------------------------------------------------------------------------------------------------------------------------------------------------------------------------------------------------------------------------------------------|
| <i>Culex tarsalis</i>          | [36]  | USA                                                    | Nakayama (genotype III; human isolate, Japan, 1935)                                 | n/d                                           | feeding of mixture of 10% mouse brain virus suspension and defibrinated rabbit blood on soaked cotton | infection proven due to virus recovery from blood-fed mosquitoes at 15–25 dpi                                                                               | n/d | 6% (2/35) at 6–10 dpi [transmission to 21–28 day old Swiss mice (Webster strain)]                                                                                                                                                                   |
|                                | [148] | Japan (field caught)                                   | n/d                                                                                 | n/d                                           | mosquito naturally infected and directly used for transmission experiments to mice                    | n/d                                                                                                                                                         | n/d | successful transmission to mice                                                                                                                                                                                                                     |
|                                | [90]  | n/d                                                    | Nakayama (genotype III; human isolate, Japan, 1935)                                 | n/d                                           | feeding of mouse-brain-virus solution in 20% saline and defibrinated rabbit blood over cotton pads    | n/d                                                                                                                                                         | n/d | 100% (3/3) at 6–7 dpi [transmission to mice]                                                                                                                                                                                                        |
|                                | [149] | Singapore [ <i>Culex tritaeniorhynchus siamensis</i> ] | local isolate (not further determined); Nakayama (genotype III; human, Japan, 1935) | 100 LD50 per mosquito                         | Infected mouse-brain suspensions in defibrinated rabbit blood containing a little cane-sugar solution | n/d                                                                                                                                                         | n/d | transmission to chicks:                                                                                                                                                                                                                             |
| <i>Culex tritaeniorhynchus</i> | [150] | Japan (Tokyo, 1955; F12-F17 generations)               | M5/596 ( <i>Cx. tritaeniorhynchus</i> , Japan, 1955)                                | $10^{2.3}$ – $10^{3.3}$ LD50/0.04 mL          | feeding on infected pigs; or white Leghorn chicks (infected with 160,000 mice LD50)                   | feeding in viremic pigs: 55% (16/29) at 10–14 dpi, 37% (11/30) at 15–19 dpi; feeding on viremic chicks: 56% (62/111) at 10–14 dpi, 66% (47/71) at 15–19 dpi | n/d | pig-pig transmission: 33% (2/6) at 15–19 dpi, 33% (4/12) at 20–24 dpi; chick-chick transmission: 28% (8/29) at 15–19 dpi, 21% (4/19) at 20–24 dpi; additional successful transmission to Black-crowned Night Herons, Plumed Egrets, and Great Egret |
|                                | [161] | Japan (laboratory strain)                              | T-143 ( <i>Cx. tritaeniorhynchus</i> , Taipei, Taiwan, 1960)                        | viremia in pigs $10^{0.1}$ – $10^{2.5}$ LD/50 | feeding on viremic pigs                                                                               | 6% (17/293) when viremia $10^{0.1}$ – $10^1$ LD50; 14% (34/237) when viremia $10^{1.1}$ – $10^2$ LD50; 45% (48/107) when viremia $10^{2.1}$ – $10^3$ LD50   | n/d | n/d                                                                                                                                                                                                                                                 |



|       |                                                                                                    |                                                                          |                                                                                           |                                                                                                                                                               |                                                                                                                                                                        |                                              |                                                                                                                                            |
|-------|----------------------------------------------------------------------------------------------------|--------------------------------------------------------------------------|-------------------------------------------------------------------------------------------|---------------------------------------------------------------------------------------------------------------------------------------------------------------|------------------------------------------------------------------------------------------------------------------------------------------------------------------------|----------------------------------------------|--------------------------------------------------------------------------------------------------------------------------------------------|
| [151] | Japan<br>(laboratory colony)                                                                       | FM380<br>( <i>Cx. tritaeniorhynchus</i> ,<br>Japan, 1950)                | n/d<br>(viremia in chicks<br>around 10 <sup>4</sup> LD50)                                 | 3–7 days after<br>emergence feeding on<br>viremic chicks for<br>transmission to horses;<br>feeding on infected<br>horse for further<br>transmission to chicks | 70% (47/67) after<br>feeding on viremic chicks                                                                                                                         | n/d                                          | 67% (2/3)<br>[transmission to<br>horses]<br>2% (1/62)<br>[transmission to chicks;<br>mosquitoes fed on infected<br>horses]                 |
| [184] | Japan<br>(laboratory<br>colony)<br>[ <i>Culex</i><br><i>tritaeniorhynchus</i><br><i>summosus</i> ] | n/d                                                                      | n/d                                                                                       | Feeding on viremic<br>chicks                                                                                                                                  | JEV detected from 5<br>dpi on in midgut cells                                                                                                                          | JEV detected<br>from 9 dpi on in fat<br>body | JEV detected from 12<br>dpi on in salivary glands                                                                                          |
| [152] | India                                                                                              | 9215<br>( <i>Cx. tritaeniorhynchus</i> ,<br>India 1964)                  | n/d                                                                                       | feeding on pig for 1 h                                                                                                                                        | 65% at 14 dpi<br>(total:148/228)                                                                                                                                       | n/d                                          | 14% (2/14)<br>[transmission to suckling<br>mice];<br>64% (25/39)<br>[virus detection in<br>saliva];<br>67% (2/3)<br>[transmission to pigs] |
| [185] | n/d<br>(laboratory<br>colony)                                                                      | Attenuated m strains of<br>Mukai<br>(human, Japan),                      | <i>blood meal</i> : 1.5–3.9<br>TCID50<br><i>chicken</i> :<br>4.9–6.2 SMICLD50             | Feeding blood meal<br>with fresh heparinized<br>rabbit blood through nylon<br>gauze, and<br>feeding on infected<br>chickens (white Leghorn)                   | <i>blood meal</i> :<br>NO infection with<br>attenuated JEV;<br><i>Chicken</i> :<br>100% (18/18) with<br>Mukai strain;<br>0% (22/22) with<br>highly attenuated m strain | n/d                                          | n/d                                                                                                                                        |
| [60]  | Thailand<br>(Chiengmai<br>valley)                                                                  | BKM-984–70<br>( <i>Cx. fuscocephala</i> ,<br>Thailand, 1970)             | average 8 pfu per<br>mosquito                                                             | feeding on viremic<br>white Leghorn chicken<br>(infected with 1700 pfu 55 h<br>before mosquito feeding)                                                       | 18–20% at 10–27 dpi                                                                                                                                                    | n/d                                          | 10–40% at 11–27 dpi<br>[transmission to<br>chicks]                                                                                         |
| [61]  | Taiwan<br>(JEVRU colony)                                                                           | TaiAn 171<br>(pig, Taiwan, 1971)                                         | 10 <sup>0.89</sup> –10 <sup>1.91</sup> LD50 in<br>pig serum on day of<br>mosquito feeding | feeding on viremic pigs<br>(infected with 10 <sup>5.5</sup> mouse<br>LD50)                                                                                    | n/d                                                                                                                                                                    | n/d                                          | 0% at 12 dpi<br>10% at 17 dpi<br>5% at 18 dpi<br>[transmission to white<br>leghorn chicks]                                                 |
| [153] | Japan<br>(laboratory<br>colony, Tokyo)                                                             | JaGAR 01 (genotype III;<br><i>Cx. tritaeniorhynchus</i> , Japan<br>1959) | 10 <sup>1.7</sup> LD50 per<br>blood meal                                                  | artificial membrane<br>feeding with heparinized<br>rabbit blood (Nylon gauze as<br>membrane)                                                                  | when fed with >10 <sup>4</sup><br>LD50/0.002 mL then<br>infection rates<br>approaching 100% could<br>be expected                                                       | n/d                                          | virus detected in<br>salivary glands 6–24<br>dpi, and<br>in saliva from 10–20<br>dpi                                                       |

|       |                                                                                                                                                                         |                                                                    |                                                               |                                                                                                                                           |                                                                                                 |     |                                                                                                                                        |
|-------|-------------------------------------------------------------------------------------------------------------------------------------------------------------------------|--------------------------------------------------------------------|---------------------------------------------------------------|-------------------------------------------------------------------------------------------------------------------------------------------|-------------------------------------------------------------------------------------------------|-----|----------------------------------------------------------------------------------------------------------------------------------------|
| [110] | India<br>(laboratory colony, 1967)                                                                                                                                      | 733913<br>(genotype I; human, India)                               | 4.0 dex (viremia in chicks at time point of mosquito feeding) | feeding on chicks (infected with 5.0 dex) over night                                                                                      | n/d                                                                                             | n/d | successful transmission to chicks                                                                                                      |
| [154] | India<br>(laboratory colony, Virus Research Centre)                                                                                                                     | n/d<br>( <i>Cx. whitmorei</i> , India)                             | 1.2–2.5 dex LD50                                              | feeding on viremic Ardeid birds ( <i>Bubulcus ibis</i> , <i>Ardeola grayii</i> ) or white Leghorn chicks (infected with 2.7–3.3 dex LD50) | n/d                                                                                             | n/d | 100% (2/2) at 8–11 dpi [transmission to to <i>Ardeola grayii</i> ]<br><br>67% (2/3) at 8–11 dpi [transmission to white Leghorn chicks] |
| [49]  | India<br>(Pune, laboratory colony)                                                                                                                                      | 733913 (genotype I; human, India)                                  | n/d<br>(ducklings infected with 4.9–5.2 dex)                  | feeding in viremic ducklings (viremia 1–4.5 dex)                                                                                          | 41% (11/27) at 9–12 dpi                                                                         | n/d | 100% (7/7) [transmission to ducklings]                                                                                                 |
| [169] | Japan<br>(laboratory colony) [ <i>Culex tritaeniorhynchus summorosus</i> ]                                                                                              | JaGAR 01 (genotype III; <i>Cx. tritaeniorhynchus</i> , Japan 1959) | viremic chicken with 10 <sup>3</sup> icLD50/0.02 mL           | feeding on viremic chicken                                                                                                                | 90% (36/40) 10–14 dpi                                                                           | n/d | n/d                                                                                                                                    |
| [183] | Japan<br>(laboratory colony)                                                                                                                                            | JaGAR 01 (genotype III; <i>Cx. tritaeniorhynchus</i> , Japan 1959) | n/d                                                           | intrathoracic injection or blood meal feeding with defibrinated rabbit blood through nylon-gauze membrane                                 | n/d                                                                                             | n/d | JEV detected in salivary glands 26 dpi (intrathoracic injection), or 14 dpi (membrane feeding)                                         |
| [174] | Japan<br>(laboratory colonies from Kyoto, 1966; Osaka, 1976; Okinawa, 1970; Miyagi, 1970; Nagasaki, 1965; Amami, 1972); and Taiwan<br>(laboratory colony, Taipei, 1971) | JaGAR 01 (genotype III; <i>Cx. tritaeniorhynchus</i> , Japan 1959) | 10 <sup>1.7</sup> –10 <sup>2.6</sup> LD50/0.03 mL             | artificial membrane feeding with defibrinated rabbit blood                                                                                | Kyoto: 30–60%; Osaka: 50–60%; Okinawa: 60%; Miyagi: 50%; Nagasaki: 40%; Amami: 95%; Taiwan: 15% | n/d | n/d                                                                                                                                    |

|       |                                                |                                                                                                                                                   |                                                                                                                                    |                                                                                                                                           |                                                                                                                                                                                                                                                                                              |                                        |                                                                                                                                                                                                                                           |
|-------|------------------------------------------------|---------------------------------------------------------------------------------------------------------------------------------------------------|------------------------------------------------------------------------------------------------------------------------------------|-------------------------------------------------------------------------------------------------------------------------------------------|----------------------------------------------------------------------------------------------------------------------------------------------------------------------------------------------------------------------------------------------------------------------------------------------|----------------------------------------|-------------------------------------------------------------------------------------------------------------------------------------------------------------------------------------------------------------------------------------------|
|       |                                                |                                                                                                                                                   |                                                                                                                                    |                                                                                                                                           | oral infection<br>at 12–15 dpi<br>SA-14:<br>100% (19/19)<br>(mean conc.: 10 <sup>5.7</sup><br>TCID50/mosquito)<br>JE 2–8:<br>11% (4/36)<br>(mean conc.: 10 <sup>1</sup><br>TCID50/mosquito)<br><br>intrathoracic<br>infection at 10 dpi<br>SA-14:<br>100% (45/45)<br>JE 2–8:<br>100% (35/35) |                                        | oral infection<br>at 12–15 dpi<br>SA-14:<br>76% (total: 26/34)<br>JE 2–8:<br>0% (total: 0/37) at<br><br>intrathoracic infection<br>at 12–15 dpi<br>SA-14:<br>100% (total: 46/46)<br>JE 2–8:<br>3% (total: 1/36)<br>[transmission to mice] |
| [155] | Taiwan (colony)                                | JE 2–8<br>(vaccine strain<br>originated from strain SA-<br>14)<br>SA-14 (genotype III; <i>Cx.</i><br><i>tritaeniorhynchus</i> , China,<br>1960)   | 10 <sup>2.7</sup> –10 <sup>3</sup><br>TCID50/mL for oral<br>infection;<br>10 <sup>5</sup> TCID50/mL for<br>intrathoracic infection | oral infection with<br>human red blood cells, calf<br>serum and sucrose, feeding<br>with cotton pledges;<br>or<br>intrathoracic injection | n/d                                                                                                                                                                                                                                                                                          |                                        |                                                                                                                                                                                                                                           |
| [51]  | India<br>(laboratory<br>colony)                | 733913<br>(genotype I; human,<br>India)                                                                                                           | n/d<br>(chicks infected<br>with 4.0 dex)                                                                                           | feeding on chicks                                                                                                                         | n/d                                                                                                                                                                                                                                                                                          | n/d                                    | successful<br>transmission to chicks                                                                                                                                                                                                      |
| [181] | Japan<br>(laboratory<br>colony)                | n/d<br>(isolated from <i>Cx.</i><br><i>annulus</i> , Taiwan 1972)                                                                                 | 10 <sup>4.2</sup> MID50 per<br>mosquito                                                                                            | Parenteral infection<br>(injection)                                                                                                       | JEV detected at 7 dpi                                                                                                                                                                                                                                                                        | n/d                                    | n/d                                                                                                                                                                                                                                       |
| [186] | China<br>(field caught, F0,<br>Beijing)        | A2                                                                                                                                                | n/d                                                                                                                                | Feeding on infected<br>Swiss mice                                                                                                         | 83% (10/12) at 15<br>dpi;<br><i>Co-infection with</i><br><i>M14 virus</i> :<br>8% (1/12) at 10–15<br>dpi                                                                                                                                                                                     | n/d                                    | n/d                                                                                                                                                                                                                                       |
| [187] | Thailand<br>(field caught, F1,<br>Bang Pa-In)) | KE094<br>(genotype I; human,<br>Thailand, 1983);<br>34–35 CT<br>(genotype III; isolated<br>from <i>Cx. tritaeniorhynchus</i> ,<br>Thailand, 1982) | 1 pfu per mosquito                                                                                                                 | Intrathoracic injection                                                                                                                   | JEV detected in fat<br>body from 2 dpi on                                                                                                                                                                                                                                                    | JEV detected in<br>heads from 2 dpi on | JEV detected in<br>salivary glands from 4 dpi<br>on (when mosquitoes held<br>at 32 °C)                                                                                                                                                    |
| [23]  | Japan, (Sapporo)                               | JANAr-5681<br>( <i>Cx. tritaeniorhynchus</i> ,<br>Japan, 1981)                                                                                    | n/d                                                                                                                                | virus-blood mixture<br>soaked cotton                                                                                                      | 100% at 14 dpi                                                                                                                                                                                                                                                                               | n/d                                    | 100% at 14 dpi<br>[transmission to mice]                                                                                                                                                                                                  |
| [188] | Thailand                                       | Nakayama<br>(genotype III; human,<br>Japan, 1935)                                                                                                 | 10 <sup>9.4</sup> MID50                                                                                                            | Intrathoracic injection                                                                                                                   | JEV antigen detection<br>15 dpi                                                                                                                                                                                                                                                              | n/d                                    | n/d                                                                                                                                                                                                                                       |

|       |                                                        |                                                                                                                                                                                                     |                                                                                                                              |                                                                                                                                   |                                                                                                                                                                             |                                                                                                                                                                           |                                                                                                                                                                           |
|-------|--------------------------------------------------------|-----------------------------------------------------------------------------------------------------------------------------------------------------------------------------------------------------|------------------------------------------------------------------------------------------------------------------------------|-----------------------------------------------------------------------------------------------------------------------------------|-----------------------------------------------------------------------------------------------------------------------------------------------------------------------------|---------------------------------------------------------------------------------------------------------------------------------------------------------------------------|---------------------------------------------------------------------------------------------------------------------------------------------------------------------------|
| [31]  | Taiwan<br>(laboratory colony, Petou strain, Taipei)    | MQ1-2<br>( <i>Ae. albopictus</i> , Taipei, Taiwan, 1985)                                                                                                                                            | 6.5 log <sub>10</sub><br>(LD50/0.03 mL)                                                                                      | n/d                                                                                                                               | successful infection, median virus conc. 1.02 log <sub>10</sub> MID50                                                                                                       | n/d                                                                                                                                                                       | n/d                                                                                                                                                                       |
| [92]  | Taiwan<br>(Taipei; F30-31 generation)                  | Sanhsia MQ1-2<br>( <i>Ae. albopictus</i> , Taiwan, 1995)                                                                                                                                            | 10 <sup>4.5</sup> pfu/mL (ingested 10 <sup>5.48</sup> pfu/mL per mosquito); and 10 <sup>3</sup> to 10 <sup>8</sup> pfu/mL    | feeding on hanging drop of defibrinated rabbit blood with 10% of sucrose for 3 h                                                  | n/d                                                                                                                                                                         | n/d                                                                                                                                                                       | 100% (total: 20/20) [transmission to mice]                                                                                                                                |
| [105] | India<br>(laboratory colony)                           | P20778<br>(genotype III; human isolate, India)                                                                                                                                                      | n/d                                                                                                                          | intrathoracic injection, or oral infection via feeding of infectious blood meal                                                   | higher infection rate in intrathoracic ally infected compared to orally infected mosquitoes                                                                                 | 51% (51/100) at 2-10 dpi [detection of JEV antigen in mosquito heads]                                                                                                     | 57% (57/100) at 1-10 dpi [JEV antigen detection in salivary glands]                                                                                                       |
| [162] | Taiwan<br>(laboratory colony)                          | SA14<br>(genotype III; Isolated from <i>Cx. pipiens</i> , China, 1954)                                                                                                                              | 6.0 log <sub>10</sub> pfu/mL (5.5 log <sub>10</sub> pfu per mosquito) for intrathoracic injection                            | Intrathoracic injection and feeding blood meal with washed calf red blood cells with membrane feeder for 15-30 min                | <i>Intrathoracic injection</i> : at 14 dpi 6.7 log <sub>10</sub> per mosquito; <i>Orally infected</i> : at 15 dpi 7.8 log <sub>10</sub> pfu per mosquito                    | JEV detected in heads                                                                                                                                                     | n/d                                                                                                                                                                       |
| [156] | South Korea<br>(Camp Greaves, 2003; F1 generation)     | ROK-2.0028<br>( <i>Cx. tritaeniorhynchus</i> , South Korea, 2000)                                                                                                                                   | 10 <sup>4.3</sup> - 10 <sup>5.2</sup> pfu/mL                                                                                 | feeding on leghorn chicks (2-4 days old, inoculated with 10 <sup>2</sup> -3 pfu 2-3 days before mosquito feeding)                 | 100% (24/24) at ≥12 dpi                                                                                                                                                     | 88% (21/24) at ≥12 dpi                                                                                                                                                    | 67% (4/6) [transmission to chicks]; 33% (5/15) [virus detected in saliva]                                                                                                 |
| [172] | n/d                                                    | 057434<br>(genotype III; human, India, 2005)                                                                                                                                                        | 100 pfu per mosquito                                                                                                         | Intrathoracic injection or feeding of infectious blood meal                                                                       | JEV detectable at 7 dpi and 10 dpi                                                                                                                                          | n/d                                                                                                                                                                       | n/d                                                                                                                                                                       |
| [157] | Japan<br>(laboratory colony, Shimane prefecture, 2018) | 17CxIT-I4-D31<br>(genotype I, <i>Cx. tritaeniorhynchus</i> , Japan, 2017);<br>JaGAR01<br>(genotype III, <i>Cx. tritaeniorhynchus</i> , Japan, 1959);<br>Muar<br>(genotype V, human, Malaysia, 1952) | 17CxIT-I4-D31: 8.9 log <sub>10</sub> ffu/mL;<br>JaGAR01: 8.6 log <sub>10</sub> ffu/mL;<br>Muar: 7.1 log <sub>10</sub> ffu/mL | Feeding defibrinated rabbit blood 1:1 mixed with virus, supplemented with 3 mM ATP via Hemotek feeder (pig intestine as membrane) | 17CxIT-I4-D31: 77% (27/35) at 7 dpi, 92% (37/40) at 14 dpi;<br>JaGAR01: 100% (49/49) at 7 dpi, 98% (48/49) at 14 dpi;<br>Muar: 100% (51/51) at 7 dpi, 98% (49/50) at 14 dpi | 17CxIT-I4-D31: 74% (26/35) at 7 dpi, 88% (35/40) at 14 dpi;<br>JaGAR01: 94% (46/49) at 7 dpi, 98% (48/49) at 14 dpi;<br>Muar: 96% (49/51) at 7 dpi, 96% (48/50) at 14 dpi | 17CxIT-I4-D31: 85% (23/27) at 7 dpi, 92% (34/37) at 14 dpi;<br>JaGAR01: 78% (38/49) at 7 dpi, 92% (44/48) at 14 dpi;<br>Muar: 88% (45/51) at 7 dpi, 92% (45/49) at 14 dpi |

|                                 |       |                                                      |                                                                |                                      |                                                                                                                                             |                                                                                                                                                                      |                                                                                   |                                                                                                                                                                  |
|---------------------------------|-------|------------------------------------------------------|----------------------------------------------------------------|--------------------------------------|---------------------------------------------------------------------------------------------------------------------------------------------|----------------------------------------------------------------------------------------------------------------------------------------------------------------------|-----------------------------------------------------------------------------------|------------------------------------------------------------------------------------------------------------------------------------------------------------------|
| <i>Culex vishnui</i>            | [105] | India<br>(laboratory colony)                         | P20778<br>(genotype III; human, India)                         | n/d                                  | intrathoracic injection, or oral infection via feeding of infectious blood meal                                                             | higher infection rate in intrathoracic infected compared to orally infected mosquitoes                                                                               | 34% (34/100) at 2–10 dpi<br>[detection of JEV antigen in mosquito heads]          | 48% (48/100) at 1–10 dpi<br>[JEV antigen detection in salivary glands]                                                                                           |
| <i>Culiseta annulata</i>        | [95]  | UK<br>(field caught, F1, Cheshire)                   | CNS138–11<br>(genotype II; human, Malaysia, 1999)              | 1 × 10 <sup>6</sup> pfu/mL           | Feeding of heparinised human blood (heated to 39 °C) with Hemotek feeding system for up to 3 h                                              | 21 °C:<br>43% (13/30) at 14 dpi;<br>57% (20/35) at 21 dpi;<br>10% (3/30) at 28 dpi<br>24 °C:<br>20% (6/30) at 14 dpi;<br>17% (4/24) at 21 dpi;<br>0% (0/5) at 28 dpi | n/d                                                                               | 21 °C:<br>30% (9/30) at 14 dpi;<br>20% (15/35) at 21 dpi;<br>3% (1/30) at 28 dpi<br>24 °C:<br>0% (0/30) at 14 dpi;<br>0% (0/24) at 21 dpi;<br>0% (0/5) at 28 dpi |
| <i>Culiseta incidens</i>        | [36]  | USA                                                  | Nakayama<br>(genotype III; human, Japan, 1935)                 | n/d                                  | feeding of mixture of 10% mouse brain virus suspension and defibrinated rabbit blood on soaked cotton                                       | infection proven due to virus recovery from blood-fed mosquitoes at 17 and 20 dpi                                                                                    | n/d                                                                               | no transmission to 21–28 day old Swiss mice (Webster strain)                                                                                                     |
| <i>Culiseta inornata</i>        | [36]  | USA                                                  | Nakayama<br>(genotype III; human, Japan, 1935)                 | n/d                                  | feeding of mixture of 10% mouse brain virus suspension and defibrinated rabbit blood on soaked cotton                                       | infection proven due to virus recovery from blood-fed mosquitoes at 20 dpi                                                                                           | n/d                                                                               | 19% (3/16)<br>[transmission to 21–28 day old Swiss mice (Webster strain)]                                                                                        |
| <i>Heizmannia taiwanensis</i>   | [181] | Taiwan<br>(laboratory colony, Hsinchu)               | n/d<br>(isolated from <i>Cx. annulus</i> , Taiwan 1972)        | 10 <sup>4.2</sup> MID50 per mosquito | Parenteral infection (injection)                                                                                                            | JEV detected at 7 dpi                                                                                                                                                | n/d                                                                               | n/d                                                                                                                                                              |
| <i>Opifex fuscus</i>            | [166] | New Zealand<br>(laboratory colony, Wellington, 2007) | Nakayama<br>(genotype III; human, Japan, 1935)                 | 8.1 log10 pfu/mL                     | Feeding of virus mixed with goose, rabbit, or bovine blood, 2.5% sucrose, 0.02 µM ATP over soaked pledget                                   | 74% (37/50) at 14 dpi                                                                                                                                                | 70% (26/37) at 14 dpi                                                             | 0% (0/37) at 14 dpi                                                                                                                                              |
| <i>Mansonia septeimpunctata</i> | [38]  | Australia<br>(field caught, Cairns, Queensland)      | TS3306<br>(genotype II; <i>Och. vigilax</i> , Australia, 1998) | mean 10 <sup>4.5</sup> TCID50/mL     | feeding for 2–4 h at 37 °C on virus diluted in heparinized rabbit blood and 1% sucrose by glass membrane feeder (pig intestine as membrane) | 67% (16/24) at 14–15 dpi                                                                                                                                             | 54% (13/24) at 14–15 dpi<br>[virus detection in legs, and head + salivary glands] | n/d                                                                                                                                                              |
| <i>Mansonia uniformis</i>       | [38]  | Australia<br>(field caught, Cairns, Queensland)      | TS3306<br>(genotype II; <i>Och. vigilax</i> , Australia, 1998) | mean 10 <sup>4.5</sup> TCID50/mL     | feeding for 2–4 h at 37 °C on virus diluted in heparinized rabbit blood and 1% sucrose by glass membrane feeder (pig intestine as membrane) | 100% (1/1) at 14–15 dpi                                                                                                                                              | 100% (1/1) at 14–15 dpi<br>[virus detection in legs, and head + salivary glands]  | n/d                                                                                                                                                              |

|                                    |       |                                              |                                                             |                                      |                                                                                                                                             |                         |     |                                                                    |
|------------------------------------|-------|----------------------------------------------|-------------------------------------------------------------|--------------------------------------|---------------------------------------------------------------------------------------------------------------------------------------------|-------------------------|-----|--------------------------------------------------------------------|
| <b><i>Topomyia yanbarensis</i></b> | [181] | Taiwan (laboratory colony, Taipei)           | n/d (isolated from <i>Cx. annulus</i> , Taiwan 1972)        | 10 <sup>4.2</sup> MID50 per mosquito | Parenteral infection (injection)                                                                                                            | JEV detected at 7 dpi   | n/d | n/d                                                                |
| <b><i>Tripteroides bambusa</i></b> | [181] | Taiwan (laboratory colony, Taitung)          | n/d (isolated from <i>Cx. annulus</i> , Taiwan 1972)        | 10 <sup>4.2</sup> MID50 per mosquito | Parenteral infection (injection)                                                                                                            | JEV detected at 7 dpi   | n/d | n/d                                                                |
| <b><i>Verrallina funerea</i></b>   | [38]  | Australia (field caught, Cairns, Queensland) | TS3306 (genotype II; <i>Och. vigilax</i> , Australia, 1998) | mean 10 <sup>4.5</sup> TCID50/mL     | feeding for 2–4 h at 37 °C on virus diluted in heparinized rabbit blood and 1% sucrose by glass membrane feeder (pig intestine as membrane) | 11% (4/36) at 14–15 dpi | n/d | 7% (1/15) at 14–15 dpi [transmission to Quackenbush suckling mice] |

\* Species name (without subspecies), outdated species named in []; & Genotype and isolation details in brackets; # Detection of virus in saliva if not mentioned otherwise; TCID50 50% tissue infectious dose; WMLC50 50% weaning mice intracranial lethal dose; LC50 50% lethal dose; pfu plaque forming unit; ffu foci forming unit; dpi days post infection (exposure); n/d not determined.
